# Supplementary material for: CSF Biomarker Profile of Cerebral Amyloid Angiopathy: Diagnostic Performance and Imaging Correlates in a Hospital-Based Neurology Cohort
Source: Research Square preprint supplement (doi:10.21203/rs.3.rs-7448531/v1), 2025-10-22
Supplement: Supplementary file 1 [file 181d82b15642b80908d72c4c.docx]

## **TABLE S2. Association between clinical variables and CSF biomarker principal components**

| **Variable** | **PC 1** | | **PC 2** | |  |
| --- | --- | --- | --- | --- | --- |
| **Statistic** | **p-value** | **Statistic** | **p-value** | **Test Type** |
| Age | 0.01 | 0.81174 | -0.06 | 0.36891 | Correlation Spearman |
| Sex | 1.23 | 0.26826 | 2.01 | 0.15602 | U Mann Whitney |
| Education | 0.17 | 0.00893 | 0.01 | 0.91029 | Correlation Spearman |
| Ethnicity | 0.17 | 0.68082 | 0.12 | 0.72537 | Kruskal-Wallis Test |
| Hypertension | 1.12 | 0.28898 | 1.97 | 0.16035 | U Mann Whitney |
| Diabetes | 0 | 0.9934 | 1.41 | 0.23522 | U Mann Whitney |
| Dyslipidemia | 2.29 | 0.13028 | 2.74 | 0.09768 | U Mann Whitney |
| Obesity | 0.97 | 0.32414 | 0.15 | 0.70139 | U Mann Whitney |
| Previous ischemic cardiopathy | 0.51 | 0.4734 | 0.14 | 0.70506 | U Mann Whitney |
| Use of antiplatelet drugs | 1.19 | 0.27614 | 0.4 | 0.52635 | U Mann Whitney |
| APOE ε2 | 1.64 | 0.19977 | 1.08 | 0.29952 | U Mann Whitney |
| APOE ε4 | 30.45 | <0.00001 | 0.93 | 0.33365 | U Mann Whitney |

For each principal component (PC) derived from CSF biomarkers, we assessed associations with key demographic and clinical variables. Depending on the variable type, we applied Spearman rank correlation, Mann–Whitney U, or Kruskal–Wallis tests. The table presents corresponding *p*-values and test statistics (Spearman’s ρ or χ2).
