# Supplementary material for: CSF Biomarker Profile of Cerebral Amyloid Angiopathy: Diagnostic Performance and Imaging Correlates in a Hospital-Based Neurology Cohort
Source: Research Square preprint supplement (doi:10.21203/rs.3.rs-7448531/v1), 2025-10-22
Supplement: Supplementary file 3 [file 304e7f244dc3c351726735dc.docx]

## **TABLE S1. ANCOVA models comparing CSF biomarkers across diagnostic groups**

|  | | **Model 1** | | **Model 2** | |
| --- | --- | --- | --- | --- | --- |
| **Biomarker** | Group | Adjusted mean (95% CI) | p for trend | Adjusted mean (95% CI) | p for trend |
| Aβ40 | HC | 14217.51 (13020.76;15414.26) | <0.0001 | 14436.42 (13109.68;15763.16) | <0.0001 |
| CAA-nonAD | 10164.92 (8812.7;11517.13) | 10276.79 (8802.58;11750.99) |
| CAA-AD | 11119.02 (9838.03;12400.01) | 11109.37 (9782.7;12436.04) |
| AD | 14217.04 (13661.49;14772.6) | 13773.42 (13103.57;14443.26) |
| Aβ42 | HC | 1313.23 (1226.92;1399.54) | <0.0001 | 1293.61 (1190.94;1396.28) | <0.0001 |
| CAA-nonAD | 736.05 (638.53;833.57) | 734.74 (620.66;848.83) |
| CAA-AD | 431.22 (338.84;523.6) | 442.65 (339.99;545.32) |
| AD | 605.26 (565.19;645.32) | 604.06 (552.22;655.89) |
| Aβ42/Aβ40 | HC | 0.09 (0.09;0.1) | <0.0001 | 0.09 (0.09;0.1) | <0.0001 |
| CAA-nonAD | 0.07 (0.06;0.07) | 0.07 (0.06;0.07) |
| CAA-AD | 0.04 (0.03;0.04) | 0.04 (0.04;0.05) |
| AD | 0.04 (0.04;0.05) | 0.04 (0.04;0.05) |
| p-tau181 | HC | 45.75 (29.98;61.53) | <0.0001 | 47.9 (30.26;65.54) | <0.0001 |
| CAA-nonAD | 46.94 (29.11;64.76) | 48.31 (28.71;67.92) |
| CAA-AD | 131.21 (114.33;148.09) | 132.64 (115;150.28) |
| AD | 132.86 (125.54;140.18) | 130.59 (121.68;139.5) |
| t-tau | HC | 332.92 (234.37;431.46) | <0.0001 | 349.36 (238.56;460.16) | <0.0001 |
| CAA-nonAD | 372.18 (260.83;483.52) | 389.44 (266.33;512.55) |
| CAA-AD | 834.14 (728.66;939.63) | 842.95 (732.16;953.74) |
| AD | 807.73 (761.98;853.48) | 791.76 (735.82;847.7) |
| Aβ42/p-tau181 | HC | 30.54 (28.6;32.48) | <0.0001 | 29.9 (27.53;32.27) | <0.0001 |
| CAA-nonAD | 16.4 (14.2;18.59) | 16.35 (13.72;18.98) |
| CAA-AD | 3.88 (1.8;5.95) | 4.13 (1.76;6.5) |
| AD | 5.15 (4.25;6.05) | 5.46 (4.27;6.66) |

We fitted separate models for each biomarker, with biomarker concentration as the dependent variable and diagnostic group (HC, CAA-nonAD, CAA-AD, AD) as the main predictor. Model 1 was adjusted for age and sex, while Model 2 included additional adjustments for education and APOE ε4 status. Reported values represent adjusted marginal means with 95% confidence intervals. Significance levels reflect overall group differences.
