# Supplementary material for: CSF Biomarker Profile of Cerebral Amyloid Angiopathy: Diagnostic Performance and Imaging Correlates in a Hospital-Based Neurology Cohort
Source: Research Square preprint supplement (doi:10.21203/rs.3.rs-7448531/v1), 2025-10-22
Supplement: Supplementary file 4 [file a0f585e330fa91b351f3f7aa.docx]

## **TABLE S3. ANCOVA models comparing CSF biomarkers across CAA burden groups**

|  | | **Model 1** | | **Model 2** | |
| --- | --- | --- | --- | --- | --- |
| **Biomarker** | **MRI Burden Score** | **Adjusted mean (95% CI)** | **p trend** | **Adjusted mean (95% CI)** | **p trend** |
| Aβ40 | 0-1 | 12681.1 (11317.54;14044.66) | 0.0026 | 13218.64 (11654.2;14783.09) | 0.00245 |
| 2 | 10287.38 (8364.61;12210.14) | 9600.21 (7296.19;11904.22) |
| 3 | 10358.23 (8471.98;12244.49) | 10236.72 (8268.65;12204.79) |
| ≥4 | 8377.08 (6675.02;10079.13) | 8611.32 (6753.81;10468.84) |
| Aβ42 | 0-1 | 758.12 (602.63;913.6) | 0.03607 | 760.87 (594.48;927.26) | 0.02204 |
| 2 | 526.21 (306.96;745.47) | 587.47 (342.42;832.52) |
| 3 | 496.48 (281.39;711.57) | 513.08 (303.77;722.4) |
| ≥4 | 409.65 (215.56;603.74) | 354.12 (156.56;551.68) |
| Aβ42/Aβ40 | 0-1 | 0.06 (0.05;0.07) | 0.46287 | 0.06 (0.05;0.07) | 0.30777 |
| 2 | 0.05 (0.04;0.06) | 0.06 (0.04;0.07) |
| 3 | 0.05 (0.03;0.06) | 0.05 (0.04;0.06) |
| ≥4 | 0.05 (0.04;0.06) | 0.04 (0.03;0.06) |
| p-tau181 | 0-1 | 104.96 (77.65;132.26) | 0.69378 | 115.83 (86.79;144.86) | 0.27425 |
| 2 | 85.63 (47.12;124.13) | 70.51 (27.75;113.26) |
| 3 | 81.3 (43.53;119.08) | 77.71 (41.18;114.23) |
| ≥4 | 85.85 (51.76;119.93) | 98.85 (64.37;133.32) |
| t-tau | 0-1 | 706.97 (531.92;882.02) | 0.47536 | 798.68 (630.4;966.96) | 0.0516 |
| 2 | 506.03 (259.19;752.87) | 357.69 (109.85;605.52) |
| 3 | 655.79 (413.64;897.94) | 622.92 (411.22;834.62) |
| ≥4 | 538.55 (320.05;757.06) | 638.17 (438.36;837.98) |
| Aβ42/p-tau181 | 0-1 | 12.66 (8.25;17.07) | 0.37919 | 12.11 (7.57;16.65) | 0.24818 |
| 2 | 8.06 (1.84;14.28) | 10.12 (3.43;16.81) |
| 3 | 9.77 (3.67;15.88) | 10.4 (4.68;16.11) |
| ≥4 | 6.88 (1.37;12.38) | 5.04 (-0.36;10.43) |

We fitted separate models for each biomarker, with biomarker concentration as the dependent variable and CAA MRI burden groups (0-1 marker/s, 2 markers, 3 markers, ≥4 markers) as the main predictor. Model 1 was adjusted for age and sex, while Model 2 included additional adjustments for education and APOE ε4 status. Reported values represent adjusted marginal means with 95% confidence intervals. Significance levels reflect overall group differences, and we considered as significant those *p*-values < 0.05/6 (Bonferroni adjustment).
