# Supplementary material for: CSF Biomarker Profile of Cerebral Amyloid Angiopathy: Diagnostic Performance and Imaging Correlates in a Hospital-Based Neurology Cohort
Source: Research Square preprint supplement (doi:10.21203/rs.3.rs-7448531/v1), 2025-10-22
Supplement: Supplementary file 5 [file fdc313097ddb0ad797e81a6a.docx]

## **TABLE S4. ANCOVA models comparing CSF biomarkers by presence of individual CAA MRI markers**

|  | | | **Model 1** | | **Model 2** | |
| --- | --- | --- | --- | --- | --- | --- |
| **MRI marker** | **Biomarker** | **Group** | **Adjusted mean (95% CI)** | **p-value** | **Adjusted mean (95% CI)** | **p-value** |
| Lobar CMBs ≥5 | Aβ40 | No | 11755.74 (10610.75;12900.74) | 0.00747 | 11891.34 (10586.2;13196.49) | 0.01262 |
| Yes | 9207.92 (7819.04;10596.8) | 9289.3 (7788;10790.59) |
| Aβ42 | No | 693.68 (570.75;816.62) | 0.00562 | 702.62 (574.14;831.11) | 0.00407 |
| Yes | 409.81 (260.68;558.93) | 404.11 (256.32;551.9) |
| Aβ42/Aβ40 | No | 0.06 (0.05;0.07) | 0.04197 | 0.06 (0.05;0.07) | 0.01491 |
| Yes | 0.05 (0.04;0.05) | 0.04 (0.04;0.05) |
| p-tau181 | No | 92.36 (70.68;114.04) | 0.96483 | 95.67 (72.65;118.7) | 0.96037 |
| Yes | 91.59 (65.29;117.89) | 94.79 (68.3;121.28) |
| t-tau | No | 597.3 (457.15;737.46) | 0.66265 | 621.31 (482.1;760.51) | 0.65584 |
| Yes | 646.48 (476.48;816.49) | 669.23 (509.1;829.36) |
| Aβ42/p-tau181 | No | 12.54 (9.17;15.91) | 0.01604 | 12.66 (9.32;16) | 0.00814 |
| Yes | 5.84 (1.75;9.92) | 5.56 (1.72;9.41) |
| Yes | 8.29 (4.93;11.65) | 7.14 (3.78;10.5) |
| cSS | Aβ40 | No | 11500.08 (10435.26;12564.9) | 0.01267 | 11679.29 (10476.65;12881.93) | 0.0128 |
| Yes | 9014.23 (7430.16;10598.3) | 8942.18 (7224.21;10660.15) |
| Aβ42 | No | 614.78 (494.2;735.37) | 0.28707 | 599.88 (470.72;729.05) | 0.48999 |
| Yes | 497.47 (318.09;676.86) | 520.97 (336.46;705.48) |
| Aβ42/Aβ40 | No | 0.05 (0.04;0.06) | 0.79855 | 0.05 (0.04;0.06) | 0.3165 |
| Yes | 0.05 (0.04;0.07) | 0.06 (0.05;0.07) |
| p-tau181 | No | 101.9 (82.48;121.31) | 0.08141 | 108.6 (88.5;128.7) | 0.02865 |
| Yes | 70.7 (41.82;99.58) | 68.7 (39.99;97.42) |
| t-tau | No | 681.25 (555.54;806.97) | 0.08109 | 735.03 (615.54;854.51) | 0.01083 |
| Yes | 479.01 (291.99;666.03) | 456.2 (285.51;626.88) |
| Aβ42/p-tau181 | No | 9.42 (6.15;12.7) | 0.68773 | 8.65 (5.36;11.95) | 0.33582 |
| Yes | 10.62 (5.75;15.49) | 11.47 (6.76;16.17) |
| CSO severe PVS | Aβ40 | No | 10969.11 (9911.54;12026.69) | 0.33666 | 11079.04 (9879.25;12278.83) | 0.31227 |
| Yes | 9938.53 (8088.29;11788.77) | 9850.77 (7773.33;11928.21) |
| Aβ42 | No | 597.25 (482.65;711.86) | 0.4948 | 602.94 (481.92;723.96) | 0.34622 |
| Yes | 518.07 (317.57;718.57) | 487.54 (277.99;697.08) |
| Aβ42/Aβ40 | No | 0.05 (0.05;0.06) | 0.7072 | 0.05 (0.05;0.06) | 0.49098 |
| Yes | 0.05 (0.04;0.06) | 0.05 (0.04;0.06) |
| p-tau181 | No | 98.52 (79.99;117.04) | 0.16421 | 102 (82.43;121.58) | 0.18543 |
| Yes | 72.25 (39.84;104.66) | 75.63 (41.73;109.53) |
| t-tau | No | 659.42 (539.45;779.39) | 0.16307 | 681.19 (562.4;799.98) | 0.2027 |
| Yes | 488.87 (278.98;698.76) | 527.35 (321.66;733.04) |
| Aβ42/p-tau181 | No | 10.05 (6.95;13.14) | 0.74797 | 10.1 (6.98;13.22) | 0.52832 |
| Yes | 9.04 (3.63;14.46) | 8.11 (2.71;13.51) |
| WMHs Fazekas ≥2 | Aβ40 | No | 11919.01 (10489.43;13348.59) | 0.03572 | 12274.96 (10630.32;13919.61) | 0.02573 |
| Yes | 9960.48 (8828.42;11092.55) | 9794.9 (8495.22;11094.57) |
| Aβ42 | No | 735.91 (584.96;886.86) | 0.00975 | 786.89 (631.05;942.73) | 0.00126 |
| Yes | 478.59 (359.06;598.13) | 436.19 (313.04;559.34) |
| Aβ42/Aβ40 | No | 0.06 (0.05;0.07) | 0.08425 | 0.06 (0.05;0.07) | 0.00699 |
| Yes | 0.05 (0.04;0.06) | 0.05 (0.04;0.05) |
| p-tau181 | No | 88.52 (62.18;114.86) | 0.73318 | 88.35 (59.85;116.84) | 0.543 |
| Yes | 94.26 (73.4;115.12) | 99.76 (77.25;122.28) |
| t-tau | No | 640.7 (470.12;811.29) | 0.72792 | 664.41 (491.24;837.57) | 0.74669 |
| Yes | 602.78 (467.69;737.86) | 627.62 (490.78;764.46) |
| Aβ42/p-tau181 | No | 12.21 (7.97;16.46) | 0.15176 | 13.4 (9.14;17.65) | 0.02947 |
| Yes | 8.29 (4.93;11.65) | 7.14 (3.78;10.5) |

We fitted separate models for each biomarker, with biomarker concentration as the dependent variable and individual MRI markers as the predictors of interest. Model 1 was adjusted for age and sex, while Model 2 included additional adjustments for education and APOE ε4 status. Reported values represent adjusted marginal means with 95% confidence intervals. Significance levels reflect overall group differences, and we considered as significant those *p*-values < 0.05/6 (Bonferroni adjustment).
